# Supplementary material for: Blue carbon stocks in Baltic Sea eelgrass ( Zostera marina ) meadows
Source: Copernicus journal article supplement (doi:10.5194/bg-2016-131), 2016-04-27
Supplement: Supplementary file [file bg-2016-131-AC1-supplement.pdf]

Blue carbon stocks in Baltic Sea eelgrass (*Zostera marina*) meadows

Maria Emilia Röhr<sup>1,2\*</sup>, Christoffer Boström<sup>1</sup>, Paula Canal- Vergés<sup>3</sup>, Marianne Holmer<sup>2</sup>

<sup>1</sup>Åbo Akademi University, Faculty of Science and Engineering, Environmental and Marine Biology, Artillerigatan 6, 20520 Åbo, Finland

<sup>2</sup>University of Southern Denmark, Department of Biology, Campusvej 55, 5230 Odense M, Denmark

<sup>3</sup>Danish Shellfish Centre, DTU Aqua, Technical University of Denmark, Ørøddevej 80, 7900 Nykøbing Mors, Denmark

\* Corresponding author;

Emilia Röhr (mrohr@abo.fi)

Abstract

Although seagrasses cover only a minor fraction of the ocean seafloor, their carbon sink capacity accounts for nearly one-fifth of the total oceanic carbon burial and thus play a critical structural and functional role in many coastal ecosystems. We sampled 10 eelgrass (*Zostera marina*) meadows in Finland and 10 in Denmark to explore seagrass carbon stocks (Corg stock) and carbon accumulation rates (Corg accumulation) in the Baltic Sea area. The study sites represent a gradient from sheltered to exposed locations in both regions to reflect expected minimum and maximum stocks and accumulation. The Corg stock integrated over the top 25 cm of the sediment averaged 627g C m<sup>-2</sup> in Finland, while in Denmark the average Corg stock was over six times higher (4324 g C m<sup>-2</sup>). A conservative estimate of the total organic carbon pool in the regions ranged between 6.98-44.9 t ha<sup>-1</sup>. Our results suggest that the Finnish eelgrass meadows are minor carbon sinks compared to the Danish meadows, and that majority of the Corg produced in the Finnish meadows is exported. Similarly, the areal estimates for Corg

28 accumulation in eelgrass meadows (30 km<sup>2</sup>) in Finland (< 0.002- 0.033 t C y<sup>-1</sup>) were over two  
29 orders of magnitude lower compared to Denmark (673 km<sup>2</sup>; 0.376-3.636 Corg t y<sup>-1</sup>). Our analysis  
30 further showed that > 40 % of the variation in the Corg stocks was explained by sediment  
31 characteristics i.e. density, porosity and silt content. In addition, the distance based linear model  
32 (DistLm) analysis showed, that the root: shoot- ratio of *Z. marina* explained > 12 % and  
33 contribution of *Z. marina* detritus to the sediment surface Corg pool >10 % of the variation in the  
34 Corg stocks, whereas annual eelgrass production explained additional 2.3 %. The mean  
35 monetary value for the present carbon storage and carbon sink capacity of eelgrass meadows in  
36 Finland and Denmark, were 281 and 1809 € ha<sup>-1</sup>, respectively. For a more comprehensive  
37 picture of seagrass carbon storage capacity, we conclude that future Blue Carbon studies should  
38 in a more integrative way, investigate the role of sediment biogeochemistry, seascape structure,  
39 plant species architecture and hydrodynamic regime.

40 Keywords: Blue Carbon, eelgrass, seagrass, carbon stock, carbon accumulation, sequestration,  
41 carbon sink

42

## 43 Introduction

44

45 The atmospheric carbon dioxide (CO<sub>2</sub>) enters the ocean via gas-exchange processes at the ocean-  
46 atmosphere interface. In the ocean dissolved inorganic carbon is fixed in photosynthesis by  
47 primary producers, and released again through respiration. A large percentage of this fixed  
48 carbon is stored and sequestered in the sediments of vegetated coastal ecosystems of which the  
49 three globally most significant are saltmarshes, mangrove forests and seagrass meadows (Herr  
50 et al. 2012). The carbon stored by these ecosystems is known as Blue Carbon (Duarte et al. 2005  
51 Duarte et al. 2013a, Nellemann et al. 2009). Blue Carbon ecosystems function as carbon sinks, in  
52 which the rate of carbon sequestered by the ecosystem exceeds the rate of carbon lost through  
53 respiration and export.

54 Seagrass meadows play a critical structural and functional role in many coastal ecosystems  
55 (Orth et al. 2006). Although seagrass meadows only cover globally about 300 000 - 600 000 km<sup>2</sup>  
56 of the ocean sea floor, corresponding to 0.1 to 0.2 % of the total area, their carbon sink capacity  
57 (capacity of seagrasses to absorb and store carbon in living and dead biomass and in the  
58 sediments) may account for up to 18 % of the total oceanic carbon burial ( Gattuso et al.1998,  
59 Duarte et al. 2005, Kennedy et al. 2010, Fourqurean et al. 2012). A large portion of the carbon  
60 sequestered (captured and stored) by seagrasses reach a conservative value of 10 Pg C in the top  
61 1 meter of seagrass sediments (Fourqurean et al. 2012). Consequently, recent global estimates  
62 imply that seagrass sediments store almost 25 200-84 000 t C km<sup>2</sup> (Fourqurean et al. 2012).  
63 More importantly, carbon in submerged sediments is stored for timescales of millennia while  
64 terrestrial soils are usually less stable and only sequester carbon up to decades (Hendriks et al.  
65 2008).

66  
67 The coasts of Scandinavia and the Baltic Sea are key distribution area for eelgrass (*Zostera*  
68 *marina* L.) meadows (Boström et al. 2002, Boström et al. 2014). The meadows extend from the  
69 fully saline (>30) along the Norwegian coast to the brackish (5-6) archipelago areas of Finland.  
70 This region is estimated to support >6 000 individual meadows covering at least 1 500 – 2 000  
71 km<sup>2</sup>, which is four times more than the combined eelgrass area of the Western Europe (Spalding  
72 et al. 2003, Boström et al. 2014). Consequently, this region plays a key role in the coastal carbon  
73 dynamics, but we presently lack estimates of the role of eelgrass for carbon storage in temperate  
74 eelgrass sediments. Seagrasses are lost at accelerating rates and it has been estimated that 29 %  
75 of global seagrass area has disappeared since the initial recording of seagrasses in 1879  
76 (Waycott et al. 2009). This decline could have severe consequences on the total capacity of  
77 marine ecosystems to store and sequester carbon in addition to the other ecosystem services  
78 seagrass meadows provide. Little is known about the magnitude of carbon emissions from  
79 degraded seagrasses ecosystems, not to mention its economic implications. Recent study points  
80 out, that despite the importance of these ecosystems to the global carbon budget, none of the

81 three Blue Carbon ecosystems have been included the global carbon market protocols  
82 (Pendleton et al. 2012).

83  
84 Seagrasses exhibit marked differences in shoot architecture and grow under variable  
85 environmental settings, making direct extrapolations between species and locations difficult.  
86 Consequently, there is a pressing need to better understand which factors are causing variability  
87 in carbon storage (carbon stored in living and dead seagrass biomass and sediments) and  
88 accumulation rates (Corg accumulation) in seagrass sediments. Indeed, recent studies show  
89 considerable influence of seagrass habitat setting, sediment characteristics and species-specific  
90 traits on the variability in carbon storage capacity in seagrass meadows (Duarte et al. 2013a,  
91 Lavery et al. 2013, Miyajima et al. 2015). Such differences contribute to uncertainty in local and  
92 global estimates of the carbon storage capacity and carbon dynamics in coastal seagrass areas.

93  
94 In order to determine seagrass carbon stocks (Corg stocks) and the capacity of seagrass  
95 meadows to sequester carbon (Corg accumulation), knowledge on the sources of the carbon  
96 stored in the sediments is also crucial. The different Corg sources vary in their turnover  
97 compared to seagrasses (sources other than seagrasses being typically faster) and volumes of  
98 standing stock (typically less) and thus affect the dynamics of the Corg stocks and accumulation  
99 (Fry et al. 1977, Kennedy et al. 2004, Kennedy et al. 2010). Seagrasses are known to be enriched  
100 in  $\delta^{13}\text{C}$  compared to other potentially sources of Corg in the seagrass sediments, such as  
101 plankton, macroalgae, allochthonous carbon material, seagrass epiphytes, and benthic microalgae  
102 (Kennedy et al. 2004, Kennedy et al. 2010, Fry and Sherr 1984, Moncreiff and Sullivan 2001,  
103 Bouillon et al. 2002, Bouillon and Boschker 2006, Macreadie et al. 2014). Thus, the stable isotope  
104 signals of seagrasses and other potential Corg sources can be relatively easily and reliably used  
105 as a proxy for identification of the origin of Corg in seagrass sediment carbon pool (Kennedy et  
106 al. 2010). Unfortunately, the current knowledge base on how these factors interact and influence  
107 carbon fluxes and storage is, at best, limited at both local and global scales.

108

109 In this study, we contrast storage, burial rates and sources of the accumulated carbon in eelgrass  
110 meadows in two regions differing in salinity, temperature and seagrass productivity, namely  
111 Finland and Denmark. Specifically we asked; (1) How large is the carbon storage capacity (Corg  
112 stocks) of Baltic Sea eelgrass meadows? (2) Which are the environmental factors determining  
113 the variability of carbon storage (Corg stocks) and accumulation (Corg accumulation) at local  
114 and regional scales? (3) How do the sediment characteristics influence the carbon storage (Corg  
115 stocks) of eelgrass meadows at local and regional scales? (4) How much carbon (Corg stocks) is  
116 presently stored in Finnish and Danish eelgrass meadows respectively and (5) what is the  
117 present and historical lost (Denmark) monetary carbon value?

118

## 119 Materials and methods

### 120 Study area

121

122 Plant and sediment samples were collected in June-September 2014 from 10 sites in Finland  
123 (The Archipelago Sea) and 10 sites in Denmark (Funen and Limfjorden) (Fig. 1). The Baltic Sea  
124 sediments are typically mineral sediments consisting of glaciofluvial deposits and only a small  
125 fraction of the sediment carbon content consists of carbonates (Kristensen and Andersen 1987).  
126 The inorganic carbon content in our samples was low (0.5 to 5 % inorganic carbon of total  
127 carbon content, n= 10 per region) and therefore carbonates were not removed from the  
128 sediment samples prior to the analysis to avoid analytical errors in low organic samples  
129 (Schlacher and Connolly 2014). The study sites in each region spanned a gradient from sheltered  
130 to exposed areas. The Archipelago Sea of southwestern Finland is a shallow (mean depth 23 m),  
131 brackish (salinity 5-6) coastal area characterized by a complex mosaic of some 30.000 islands  
132 and skerries (Boström et al. 2006, Downie et al. 2013). The region is heavily influenced by

human pressures, especially eutrophication, and exhibits naturally steep environmental gradients, as well as, strong seasonality in temperature and productivity (Boström et al. 2014).

Limfjorden is a brackish water area in the Jutland peninsula connected to both North Sea and Kattegat with salinity ranging from 17 to 35. The Fjord has a surface area of ~1500 km<sup>2</sup> and a mean depth of 4.7 m (Olesen and Sandjensen 1994, Wiles et al. 2006, Petersen et al. 2013). Funen is located between the Belt Seas in the transition zone where waters from Baltic Sea and Kattegat meet. The salinity of the area ranges between 10 and 25 and the annual mean water temperature ranges from 10-15° C (Rask et al. 1999). This study was conducted in shallow (< 10 m) fjords around Funen. Also the Danish areas are heavily influenced by human pressures, especially eutrophication from intense agricultural farming. (DMU; Danmarks Miljøundersøgelser, 2003).

#### Field sampling

All samples were collected from depths of 2.5-3 m by scuba diving. At all sites, three replicate sediment cores (corer: length: 50 cm, diameter: 50 mm) were taken randomly at a minimum distance of 5 m from each other. The corer was manually forced to a depth of 30-40 cm. The cores were capped in both ends under water, and kept in a vertical position during transport to the laboratory. Eelgrass production and biomass were measured at all sites from four randomly chosen locations within the eelgrass meadow. To insure statistical independence, each replicate core was separated by distance of at least 15 m within the meadow. In the vicinity of each sediment core, shoot density was counted using a 0.25 m<sup>2</sup> frame, and above- and belowground biomass samples were collected with a corer (diameter 19.7 cm) and bagged underwater. Sedimentation was measured at one exposed and one sheltered site in each region by deploying two sediment traps with five replicate collection tubes (length: 115 mm, diameter: 28 mm). Traps were positioned at a level corresponding to the upper canopy at a water depth of 2.5 m for

160 2 days. Additionally, when present, samples of plants and algae (drift algae, other angiosperms,  
161 phytoplankton and epiphytes) considered most likely to be carbon sources in the eelgrass  
162 meadows were collected from each site for identification and analysis of stable isotope  
163 composition. Approximately ~ 10 g wet material was collected for each species. Annual eelgrass  
164 production was determined from estimates of previous growth by applying the horizontal  
165 rhizome elongation technique (Short and Duarte 2001). From each site, five replicate rhizome  
166 samples with the longest possible intact rhizome carefully removed, were collected and  
167 transported to the laboratory for further analysis.

168

169 Seagrass variables

170

171 In the laboratory, the above- and belowground biomass was separated and eelgrass leaves and  
172 rhizomes were cleaned from epiphytes, detritus and fauna with freshwater and gently scrubbed  
173 with a scalpel. All plant material was dried to constant weight (48 h in 60° C). The belowground  
174 biomass was separated into living and dead rhizomes and dried separately. Only the living  
175 rhizomes were used for the belowground biomass measurements while samples of both living  
176 and dead rhizomes were used for analysis of POC and  $\delta^{13}\text{C}$ . The root: shoot-ratio was calculated  
177 as the ratio between below- and aboveground biomasses of *Z. marina* samples. A pooled sample  
178 of 2 youngest leaves from 10 randomly selected shoots were collected prior to drying from the  
179 aboveground biomass samples and dried separately for analysis of particulate organic carbon  
180 (POC) and stable isotopic composition of the organic carbon ( $\delta^{13}\text{C}$ ). All samples were analyzed  
181 by Thermo Scientific, delta V advantage, isotope ratio mass spectrometer. The measured isotope  
182 ratios were represented using the  $\delta$ - notation with Vienna Peedee belemnite as reference  
183 material.

184

185 Determination of annual eelgrass production was done by measuring length of each individual  
186 internode of the rhizomes to the nearest millimeters. To obtain an estimate of the mean annual

production per site, internode length measurements of individual replicates (n= 5) were pooled. Due to lack of two annual production peaks in both regions the annual production was estimated based on the distance between shortest and longest measured internodes, assuming that they represent the time point when the water temperature was at its minimum and maximum average, respectively. The time points for the water temperatures were obtained from databases of the Finnish and Danish Meteorological Institutes, respectively.

#### Sediment variables and sedimentation

In the laboratory, sediment samples were sliced into sections of 2-5 cm, where the upper 10 cm layer was divided into 2 cm layers and the remaining part in 5 cm layers. From each subsample visible plant parts and fauna were removed before the sediment was homogenized. From the 0-2 cm section a subsample of 20 ml was taken for grain size analysis by a Malvern Mastersizer 3000 particle size analyzer. The sediment silt content was calculated as the fraction with particle size of 2-63  $\mu\text{m}$  from the range of all particle sizes (Folk and Ward 1957). Sediment water content, dry bulk density and porosity were determined from a subsample of 5 ml that was taken using a cut-off 5 ml syringe and weighed before and after drying at 105°C for 6 h from all sediment layers. The dried sediment samples were homogenized in a mortar and divided into two subsamples from which one was used for analysis of sediment organic matter content (loss of ignition: 4 h in 520°C), and the other for analysis of sediment  $\delta^{13}\text{C}$  and POC as described above for the plant materials. Inorganic carbon content was low in sediments from both regions (0.003-0.3 %DW) and considered insignificant compared to the organic fraction (1-2 order of magnitude higher).

The material collected in the sediment traps was filtered on pre-weighed and combusted 50 mm GF/C filters (Whatman) and dried at 60°C for 24 hours. Dried filters were weighed and each filter was divided into two subsamples, one for analysis of organic matter content (LOI, 520°C, 4

214 h) and the other for  $\delta^{13}\text{C}$  and POC as described above. Sedimentation rates were calculated  
215 according to Gacia et al. (1999).

216

217 Corg stock and Corg accumulation calculations

218

219 To estimate sediment Corg stock and Corg accumulation of Finnish and Danish eelgrass area we  
220 used averages from 10 sites in each two regions in our calculations. The mean Corg stock  
221 (obtained by depth integration of the POC  $\text{mg C cm}^{-3}$  of 0-25 cm sediment layers) of the sampled  
222 region was multiplied with estimated seagrass area of the region based on the most recent areal  
223 estimates of seagrass distribution available in the literature (Boström et al. 2014) and given as g  
224 Corg  $\text{m}^{-2}$ . In Denmark, the extrapolations are based on the minimum and maximum estimates of  
225 the areal extent, respectively (673 and 1345  $\text{km}^2$ , (Boström et al. 2014)). Results for carbon  
226 burial (applied by multiplying the Corg stock, regional seagrass area and sediment accumulation  
227 rate estimate from literature) in each area are given as Corg accumulation ( $\text{t y}^{-1}$ ). Due to lack of  
228 long term monitoring of sediment accumulation in eelgrass meadows, , we used available  
229 minimum, average and maximum sediment accumulation rates in seagrass meadows obtained  
230 from literature (Duarte et al. 2013b, Serrano et al. 2014, and Miyajima et al. 2015).

231

232 To calculate the total Corg pool in Danish and Finnish eelgrass sediments, we summed the  
233 following three components: (1) the annual eelgrass carbon sequestration rate (Corg  
234 accumulation in  $\text{t C ha}^{-1}\text{y}^{-1}$  storage), (2) the total POC ( $\text{t ha}^{-1}$ ) in the average living aboveground  
235 and belowground *Z. marina* tissue, and (3) the mean Corg stocks ( $\text{t ha}^{-1}$ ) in eelgrass sediments in  
236 Denmark and Finland, respectively. To calculate the present and lost economic value of eelgrass  
237 carbon stocks, we used a value (40.3 €) based on the social cost of carbon with 3 % discount rate  
238 reported in the United States Government Technical Support Document (2010) and multiplied  
239 this value with the Corg stocks (tonnes). To estimate the Danish eelgrass losses over the past  
240 100 years in economic terms, we used the calculations above, but accounted for the annually lost

241 sequestration value by multiplying the rate by 100. We used the most recent loss estimates for  
242 Denmark for the period 1900-2000, assuming that the present coverage constitutes 10% or 20%  
243 of the historical area, respectively (Boström et al. 2014).

244

#### 245 Sediment carbon sources

246

247 The Isosource 1.3 isotope mixing model software (Phillips and Gregg 2003) was used to estimate  
248 the contribution of different carbon sources to the sediment surface Corg stock. We ran the  
249 Isosource model using the  $\delta^{13}\text{C}$  values obtained from stable isotope analysis of *Z. marina* leaves,  
250 living and dead rhizomes and for samples (n=1-5) of other abundant Corg sources within the  
251 meadow (see above) with increments of 1 % and tolerance of 0.1. Numbers are given as  
252 percentage contribution to the sediment surface carbon pool.

253

#### 254 Data analysis

255

256 All statistical analyses were performed using the PRIMER 6 PERMANOVA+ package (Anderson  
257 et al. 2008). A 2-factor mixed model was used, where sampling sites and region (FIN, DEN) were  
258 used as fixed factors for the biological response variable (sediment organic carbon stock, g C m<sup>-2</sup>).  
259 Prior to analysis, the environmental predictor variables (degree of sorting, sediment dry  
260 density, sediment water content, sediment porosity, sediment silt content, sediment organic  
261 content, annual production, root: shoot-ratio, shoot density and percentage of *Z. marina* detritus  
262 contribution to Corg) were visually inspected for collinearity using Draftsman plots of residuals.  
263 Due to autocorrelation between sediment variables (water content, and dry density) sediment  
264 water content was removed from the environmental variables. To achieve normality in the  
265 retained environmental variables, data was log-transformed (log(X+1) and Euclidean distance  
266 was used to calculate the resemblance matrix. The biological response variable (Corg stock in g  
267 m<sup>-2</sup>) was square-root transformed and Bray-Curtis similarity was used to calculate the

abundance matrix. The relative importance of different environmental variables was determined by use of DistLm, a distance-based linear model procedure (Legendre and Anderson 1999). DistLm model was constructed using a step-wise procedure that allows addition and removal of terms after each step of the model construction. AICc (Akaike Information Criterion with a correction for finite sample sizes) was chosen as information criterion as it enables to fit the best explanatory environmental variables from of relatively small biological dataset compared to number of environmental variables (Burnham and Anderson 2002). An alpha level of significance of 95% ( $p < 0.05$ ) was used for all the analysis. All means are reported as mean  $\pm$  SE (SEM).

## Results

### Seagrass meadow and sediment characteristics

In general, the Finnish meadows were found on exposed sandy bottoms while the environmental settings of the eelgrass meadows in Denmark were more variable (Fig. 2). Shoot density was nearly equal in both regions, averaging at  $417 \pm 75$  (shoots  $m^{-2}$ ) in Finland and  $418 \pm 32$  (shoots  $m^{-2}$ ) in Denmark. In Finland variation between sites ( $112-773$  shoots  $m^{-2}$ ) was greater than in Denmark ( $300-652$  shoots  $m^{-2}$ ). In Denmark the highest shoot density was found at the most exposed site (Nyborg), while in Finland the highest shoot density was found at Sackholm, a fairly sheltered site. The lowest shoot densities in Finland and Denmark were found in Tvärminne and Løgstør, respectively. The mean aboveground biomasses were  $101 \pm 3$  and  $145 \pm 5$  (g DW  $m^{-2}$ ) and the mean belowground biomasses  $79 \pm 5$  and  $148 \pm 13$  g (DW  $m^{-2}$ ) at Finnish and Danish sites, respectively. In Denmark, the mean proportion of POC in above-ground and below-ground *Z. marina* tissue was 35% and 29%, respectively, while the corresponding numbers for Finland were 38% and 36%, respectively. Given an average total *Z. marina* biomass (above- and belowground) of 293 (Denmark) and 180 g DW  $m^{-2}$  (Finland), we estimate the Corg pool in

bound in living seagrass biomass to 0.94 and 0.66 t ha<sup>-1</sup> in Denmark and Finland, respectively. Root: shoot-ratio was slightly lower in Finland (0.87±0.05) than in Denmark (1.14±0.12), and varied between 0.29 to 3.29 and 0.15 to 6.45 in Finland and Denmark, respectively. The annual production of eelgrass for Finland (average 524±62 g DW m<sup>-2</sup> y<sup>-1</sup>) showed relatively low variation between sites (270-803 g DW m<sup>-2</sup> y<sup>-1</sup>) being lowest at Jänisholm and highest at Ryssholmen. In Denmark, the mean annual eelgrass production rate was almost twice as high (928±159 g DW m<sup>-2</sup> y<sup>-1</sup>) with large variation (470-2172 g DW m<sup>-2</sup> y<sup>-1</sup>). Production rates were lowest and highest at Dalby and Visby, respectively (Table 1).

The sediment characteristics varied significantly between Finland and Denmark. There was a significant difference ( $F_{1,9} = 14.7$ ,  $p < 0.003$ ) between regions in terms of silt content, which was generally lower at Finnish (6.3±1%) sites than at Danish sites (20.2±3.9%), although in Denmark the variation between sites ranged from 0.8% at Nyborg to 31.6% at Thurøbund (Table 1, Fig. 2). In Finland, the variation between sites was lower and ranged from 1.6% (Kolaviken) to 15.5% (Sackholm). At the Finnish sites the mean sediment dry density was higher (1.30±0.04 g cm<sup>-3</sup>) compared to the Danish sites (1.1±0.1 g cm<sup>-3</sup>), and the Finnish sites exhibited lower within-region variability ranging from 1.1 g cm<sup>-3</sup> at Lyddaren to 1.5 cm<sup>-3</sup> at Långören, while the Danish sites varied from 0.3 g cm<sup>-3</sup> at Thurøbund to 1.5 g cm<sup>-3</sup> at Visby. The Finnish sites showed consistently lower pools of organic matter (LOI: 1.4±0.3% DW) compared to the average of Danish sites (LOI: 3.9±1.5 %DW). Consequently, the mean water content was similarly lower in Finland (20.9±0.4%: range 16-29 %) than in Denmark (37.4±1.8 %: range 17-76 %) ranging from 16.4 to 29.5 % in Finland to 17.2 to 76.0 % in Denmark (Table 1). Sediment porosity was similar in both regions, and ranged from 0.25 to 0.3 in Finland, and from 0.20 to 0.40 in Denmark. At the Finnish sites, the proxy that was used to estimate exposure (degree of sorting), varied from 0.8 to 1.5 ( $\phi$ ), with Kolaviken being the most exposed and Ängsö being the most sheltered site. In Denmark degree of sorting varied from 0.6 to 2.1 ( $\phi$ ), with Nyborg and Visby being the most exposed and sheltered sites, respectively.

322

323   Organic carbon stocks

324

325   The profiles of Corg stocks ( $\text{g C cm}^{-3}$ ) in the upper 25 cm of the sediment showed marked  
326   differences both between and within the sampled regions. At the Finnish sites, where eelgrass  
327   typically grows at exposed locations, the sediment Corg stocks were low ( $<0.001\text{--}22.1 \text{ mg C cm}^{-3}$ )  
328   <sup>3</sup>) and declined with depth at most of the 10 study sites (Fig. 3). At the Danish sites, however, the  
329   Corg stocks were more variable ( $<0.001$  to  $176.7 \text{ mg C cm}^{-3}$ ) both within and between the sites  
330   (Fig. 3). Depth integrated Corg stocks (0-25 cm,  $\text{g C m}^{-2}$ , Fig. 4) were particularly high at one  
331   sheltered site in Funen, namely Thurøbund. This site is characterized by soft sediments with  
332   high organic content, high annual eelgrass production and high belowground biomass (Table 1).  
333   The lowest eelgrass Corg stocks in Denmark were found at two relatively exposed and sandy  
334   sites, namely Nyborg and Dalby (Fig. 4). The estimate of average total Corg stock in Finland was  
335    $19 \pm 1 \text{ t C}$  taking the total area of eelgrass into account ( $30 \text{ km}^2$ ; Table 2). Using minimum and  
336   maximum estimates of the eelgrass area in Denmark the estimates for mean total sediment Corg  
337   stock in Denmark were  $2164 \pm 5$  or  $5868 \pm 14 \text{ t C}$ , respectively ( $673$  and  $1345 \text{ km}^2$ ; Table 2).

338

339   The estimated total Corg stocks in the upper 25 cm of the sediments was on average  $6.27$  and  
340    $43.6 \text{ t ha}^{-1}$  in Finland and Denmark, respectively. Using an annual carbon sequestration value of  
341    $0.05$  and  $0.35 \text{ t ha}^{-1} \text{ y}^{-1}$  for Finland and Denmark, respectively, and assuming sediment  
342   accumulation of  $2.02 \text{ mm y}^{-1}$  on average (Table 2), the total pool of Corg in the *Z. marina*  
343   meadows (Corg bound in living biomass, sediment Corg stock and Corg sequestration)  
344   corresponds to  $6.98 \text{ t ha}^{-1}$  ( $698 \text{ t km}^{-2}$ ) and  $44.9 \text{ t ha}^{-1}$  ( $4490 \text{ t km}^{-2}$ ) for Finland and Denmark,  
345   respectively. Using the social cost of carbon of  $40.3 \text{ € t}^{-1}$  (United States Government 2010), the  
346   present economic value of eelgrass carbon in Finnish and Danish eelgrass meadows is estimated  
347   at  $281$  and  $1809 \text{ € ha}^{-1}$ , respectively. Using an average of these values ( $1045 \text{ € ha}^{-1}$ ) and a  
348   conservative estimate of the eelgrass acreage in the Baltic Sea ( $2100 \text{ km}^2$ : Boström et al. 2014),

we estimate a total monetary value of the present sequestration by eelgrass meadows to be 219.4 million euro. Given the total eelgrass loss in Denmark for the time period 1900-2000 is between 5381 km<sup>2</sup> (present area 20% of historical distribution) and 6053 km<sup>2</sup> (present area 10% of historical distribution), this equals Corg loss of 0.042 and 0.048 Gt, respectively. Using the average value (1045 € ha<sup>-1</sup>) these areal loss estimates corresponds to a lost economic value between 562 and 632 million euro, for the minimum and maximum areal loss estimates, respectively.

#### Corg accumulation

The estimates for annual Corg accumulation in the Finnish seagrass meadows (30 km<sup>2</sup>) were low (0.002, 0.016, 0.033 Mt y<sup>-1</sup>), when applying sediment accumulation rates of 0.32, 2.02 and 4.20 mm y<sup>-1</sup>, respectively. Similarly, the sedimentation rates measured by use of sedimentation traps were 10-folds lower in Finland (3.6-7.7 gDW m<sup>-2</sup> d<sup>-1</sup>) compared to Denmark (37.6-63.4 gDW m<sup>-2</sup> d<sup>-1</sup>). The low Corg accumulation in Finnish meadows were a result of low mean Corg stocks and relatively small size of seagrass area in the region compared to Denmark (Table 2). The Corg accumulation for the Danish sites differed between the two sub-regions Limfjorden (18 km<sup>2</sup>) and Funen (179 km<sup>2</sup>). At the sampling sites around Funen, the Corg accumulation values were 0.139, 0.881 and 1.832 Mt y<sup>-1</sup>, while in Limfjorden the Corg accumulation were lower (0.006, 0.038 and 0.079 Mt y<sup>-1</sup>) and similar to Corg accumulation for Finland. Using upper and lower eelgrass areal estimates, total Corg accumulation based on 3 sediment accumulation rates (0.376, 2.373, 3.636 and 0.75, 4.741 and 9.859 Mt y<sup>-1</sup>) in Denmark were more than four orders of magnitude higher than the estimated total Corg accumulation in Finnish eelgrass meadows.

#### Carbon sources

375 The  $\delta^{13}\text{C}$  values of the surface sediment within regions where quite homogenous ranging from -  
376 22.8 to -18.9 ‰ and -17.6 to 13.5 ‰, in Finland and Denmark respectively. The  $\delta^{13}\text{C}$  in *Z.*  
377 *marina* tissues ranged from -11.4 to -8.5 ‰ and from -12.5 to -8.2‰, in Finland and Denmark,  
378 respectively. There was no significant difference between living above- and belowground tissue  
379 and decomposed belowground tissue and samples were pooled in the isotope mixing model.  
380 Although *Z. marina* was the dominant seagrass species in Finland, the study sites included both  
381 monospecific and mixed seagrass meadows, where species like *Potamogeton pectinatus* and  
382 *Potamogeton perfoliatus* were growing in mixed stands with *Z. marina*. *P. pectinatus* ( $\delta^{13}\text{C}$  -11.3  
383 to -7.6 ‰) and *P. perfoliatus* ( $\delta^{13}\text{C}$  -15.6 to -12.6 ‰) were both present at five of the Finnish  
384 study sites (Jänisholm, Sackholm, Hummelskär, Tvärminne and Fårö) and *P. pectinatus* was  
385 present at Kolaviken, Ryssholmen and Lyddaren. *Ruppia cirrhosa* (-11.5 to -8.8 ‰) was less  
386 abundant and found at three of the Finnish sites (Sackholm, Ängsö, Kolaviken) and at one study  
387 site in Denmark (Kertinge). The  $\delta^{13}\text{C}$  for phytoplankton ranged from -24.6 to -22.6 ‰ and -18.6  
388 to 16.4 ‰, in Finland and Denmark, respectively. Drift algae was present at all Danish study  
389 sites, except Thurøbund, and had  $\delta^{13}\text{C}$  values from -17.9 to -13.5 ‰, but only at five Finnish sites  
390 (Ängsö, Ryssholmen, Fårö, Långören and Hummelskär) with  $\delta^{13}\text{C}$  values ranging from -20.0 to -  
391 16.3‰.

392  
393 The isotope mixing model showed that at all Finnish sites, phytoplankton and allochthonous  
394 material were the major contributors (43-86 %) to the sediment surface Corg pool. In Denmark  
395 *Z. marina* contributed with 13-81 % to the sediment surface Corg pool, contribution being  
396 lowest at the most exposed site Nyborg and highest in Visby. The corresponding numbers for  
397 Finland were 1.5-32 %, being lowest and highest in Tvärminne and Lyddaren, respectively (Fig.  
398 5). The DistLm analysis showed that the *Z. marina* contribution to the sediment surface  $^{13}\text{C}$  pool  
399 explained 10.9 % of the variation in the measured Corg stocks (Fig. 6, Table 3 and Table 4). Drift  
400 algae was a significant contributor (72%) to the sediment surface Corg pool at the Danish sites,  
401 while it appeared to play only a minor role (0-21%) in Finland. The carbon sources were

generally more mixed at the Danish study sites compared to the Finnish sites where phytoplankton dominated (Fig. 5).

## Discussion

Recent studies have shown considerable variation in the global estimates of carbon stocks (Corg stocks) and carbon accumulation rates (Corg accumulation) in seagrass meadows, indicating an incomplete understanding of factors influencing this variability (Fourqurean et al. 2012, Duarte et al. 2013a, Lavery et al. 2013, Miyayima et al. 2015). The Baltic Sea forms a key distribution area for eelgrass in Europe, but similarly to the global data sets, we have so far lacked estimates on seagrass carbon stocks and accumulation.

In our study, the Finnish eelgrass meadows showed consistently very low Corg stocks and Corg accumulation, and the meadows were minor carbon sinks compared to the Danish meadows. The Danish sites showed more variation in the sediment Corg stock and accumulation and Corg stock was particularly high at one site, Thurøbund ( $26138 \pm 385 \text{ g C m}^{-2}$ ), which is a relatively sheltered site with high organic sediments. Expectedly, due to both larger overall eelgrass acreage and larger Corg stocks in the Danish meadows, the total Corg accumulation ( $0.38\text{--}9.86 \text{ t y}^{-1}$ ) was three to four orders of magnitude higher than in the Finnish meadows ( $0.002\text{--}0.033 \text{ t y}^{-1}$ ). As eelgrass in Finland generally grow in more exposed locations potentially due to increased interspecific competition with freshwater plants such as common reed (*Phragmites australis*) in sheltered locations (Boström et al. 2006), it is probable that most of the Corg produced in the Finnish meadows is exported, and thus incorporated in detrital food webs in deeper bottoms. This argument is supported when applying sediment accumulation rates from literature, as only 0.15 - 2% of the annual production accumulated in Finnish meadows, while the corresponding numbers for Denmark were 0.6 - 7.8%. Duarte and Cebrian (1996) estimated that on average

25% of the global seagrass primary production is exported, and seagrass detritus may thus contribute significantly to Corg stocks in other locations, a fact that is often overlooked.

#### Extrinsic drivers of carbon sequestration in seagrass meadows

The DistLm analysis showed, that three sediment variables (dry density, silt content, porosity) and three plant variables (annual eelgrass production, the root: shoot-ratio and *Z. marina* contribution to the sediment  $^{13}\text{C}$  pool) explained 67% of the variation in the sediment Corg stock ( $\text{g C m}^{-2}$ ) (Table 3 and 4, Fig. 6). Specifically, sediment silt content alone explained > 36 % of the variation in Corg stocks (Table 3). In both regions, exposed sites characterized by sandy, low organic sediments and low silt content, had low Corg stocks. In contrast, at sheltered sites like Thurøbund in Denmark, we measured the highest sediment Corg stock along with highest silt and water content among all sites. Although sediment porosity and sediment dry density also contributed to the model, they were of minor importance (~2 % each). As proposed in previous work (Kennedy et al. 2010, Miyajima et al. 2015) accumulation of fine grained size fractions in seagrass sediments, relative to those accumulated in bare sediments, appears to be one of the major factors influencing the carbon sink capacity of seagrass meadows, and may thus be a useful proxy for the sink capacity.

In addition, it is well known, that seagrasses modify sediments by reducing water flow and consequently increasing particle trapping and sedimentation and reducing resuspension (Fonseca and Fisher 1986, Fonseca and Cahalan 1992, Gacia et al. 2002, Hendriks et al. 2008, Boström et al. 2010) and also increasing Corg (Kennedy et al. 2010). Our finding of low carbon sink capacity of Finnish seagrass meadows was supported by low sedimentation rates compared to the Danish sites. These rates are similar to sedimentation rates measured in previous studies (1.5 - 500 and 3.1- 20  $\text{gDW m}^{-2} \text{d}^{-1}$ ; Gacia and Duarte 2001, Holmer et al. 2004) from *Posidonia*

455 *oceanica* meadows. Thus, at the Finnish sites, the input of organic particles and the potential for  
456 carbon accumulation of eelgrass detritus and external organic matter in the sediment is low.  
457

458 Furthermore, the DistLm analysis showed, that *Z. marina* contribution to the sediment surface  
459 carbon pool was an important driver (> 10.9%) of the variation in sediment Corg stock (Table 3  
460 and 4, Fig. 6). We found increasing Corg stocks at the Danish sites, where *Z. marina* was the  
461 major source of organic carbon, contributing with 13 to 81% to the surface sediment Corg. In  
462 contrast, at the Finnish sites where only a minor fraction of carbon buried in sediments derive  
463 from eelgrass detritus (1.5 to 39.6%) the Corg stocks were low. Correspondingly, the average  
464  $\delta^{13}\text{C}$  value (-16.2‰) in the Danish sediment samples was similar to the global median value  
465 (-16.3‰ $\pm$ 0.2‰) reported by Kennedy et al. (2010) in which on average 51 % of the carbon  
466 was derived from seagrass detritus . The importance of the *Z. marina* contribution to the Corg  
467 stocks may be explained by slow decomposition rates of seagrass tissue. Especially, the high  
468 proportion of refractory organic compounds in the seagrass belowground parts and high C:N:P-  
469 ratios of seagrass tissue in general make seagrasses less biodegradable than most marine plants  
470 and algae (Fourqurean and Schrlau 2003, Vichkovitten and Holmer 2004, Kennedy and Björk  
471 2009, Holmer et al. 2011). The slow decomposition rates are also a result of reduced sediment  
472 conditions commonly encountered in Danish seagrass meadows (Kristensen and Holmer 2001,  
473 Holmer et al. 2009, Pedersen et al. 2011). Despite the extensive distribution (2-29 ha), high  
474 biomasses (300-800 g DW m<sup>-2</sup>) and major impact of drifting algal mats on coastal ecosystem  
475 functioning (Norkko & Bonsdorff 1996, Salovius & Bonsdorff 2004, Rasmussen et al. 2013,  
476 Gustafsson & Boström 2014), the stable isotope composition of the sediments suggests that drift  
477 algae had a surprisingly minor influence on the sediment surface Corg pool in both regions.  
478 Thus, despite present on several sampling sites, drift algae is likely exported and mineralized in  
479 the water column and in deeper sedimentation basins. Furthermore, we found that at all study  
480 sites in both regions, there were several other potential sources influencing the sediment  
481 surface Corg pool. Bouillon et al. (2007) showed that in seagrass sediments adjacent to

482 mangrove forests in Kenya, none of their sites had seagrass material as the sole source of Corg,  
483 instead mangrove-derived detritus contributed significantly to the tropical seagrass sediment  
484 Corg pool. Similarly, at majority of our study sites we observed several species of macroalgae  
485 and seagrasses that contributed to the sediment Corg pool, in particular at the Danish sites.

486  
487 The root: shoot-ratio explained 12.7 % of the variation in the Corg stocks. The highest Corg  
488 stocks, below-ground biomass and root: shoot-ratio was found in Thurøbund (Denmark). The  
489 relatively high explanatory value of the root: shoot-ratio could be explained by lower  
490 decomposition rates of the *Z. marina* belowground tissue. In Finland, the highest root: shoot-  
491 ratio (2.07) was found at Kolaviken, with a relatively low Corg stock (397 gDW C m<sup>-2</sup>). Due to  
492 higher degree of exposure at the site (degree of sorting 0.7  $\phi$ ) compared to Thurøbund (1.4  $\phi$ ) it  
493 is likely that large portion of the eelgrass production was exported away from the meadow and  
494 not stored in the sediment. The mean shoot densities were almost identical between regions,  
495 and shoot density did not contribute to the model explaining Corg.

496  
497 The annual eelgrass production explained only 2.3 % of the variation in the Corg stocks. The  
498 annual production rates were almost twice as high at Danish sites compared to the Finnish sites.  
499 Regional differences in seagrass productivity may be caused by differences in e.g. the inorganic  
500 carbon concentration in water column and light availability between the regions (with higher  
501 values in Denmark), which both affect the photosynthetic capacity of the plant (Hellblom and  
502 Björk 1999, Holmer et al. 2009, Boström et al. 2014). Eelgrass production tend to be higher in  
503 physically exposed areas compared to more sheltered areas, which can be due to improved  
504 sediment oxygen conditions and hydrodynamical effects (Hemminga and Duarte 2000). This  
505 finding was not supported by our study, in which we found the highest annual eelgrass  
506 production rates at both the most sheltered and exposed sites, namely Visby and Nyborg (DK).

507

## 508 Carbon stocks and accumulation

509

510 Our estimated Corg stocks for the study sites were generally lower (627- 4324 t C km<sup>-2</sup>) than  
511 estimates (25200-84000 t C km<sup>-2</sup>) found in the literature (Duarte et al. 2005, Nellemann et al.  
512 2009, Mcleod et al. 2011, Fourqurean et al. 2012). In Duarte et al. (2005) the data set used for  
513 the calculations was gathered from various studies conducted at different temporal scales and  
514 habitat types, as well as different methods for determination of Corg accumulation. Additionally,  
515 several of the studies were conducted in the Mediterranean *P. oceanica* meadows - a habitat with  
516 exceptionally high carbon sequestration and storage capacity (Duarte et al. 2005, Lavery et al.  
517 2013). In addition, the average sizes of Corg stocks in Finnish and Danish eelgrass meadows  
518 were also considerably lower than the mean values reported by Alongi et al. (2014) for tropical  
519 seagrass meadows (14270 t C km<sup>-2</sup>), mangroves (95600 t C km<sup>-2</sup>) and salt marshes (59300 t C  
520 km<sup>-2</sup>). In contrast, our estimate for the carbon stock in the top 25 cm for Danish and Finnish  
521 meadows (627-6005 g Corg m<sup>-2</sup>) are comparable to Australian (262-4833 g Corg m<sup>-2</sup>: Lavery et  
522 al. 2013) and Asian estimates (3800-12000 g Corg m<sup>-2</sup>: Miyajima et al. 2015).

523

## 524 Consequences of seagrass loss for carbon pools

525

526 Despite the importance of seagrasses, their global distribution has decreased by 29% since 1879  
527 primarily due to anthropogenic pressures (Waycott et al. 2009), thus weakening the carbon sink  
528 capacity of marine environments to sequester carbon (Duarte et al. 2005). Since the 1970s, the  
529 Baltic Sea has been subject to strong anthropogenic pressures (Conley et al. 2009) leading to  
530 eelgrass declines in several countries (Boström et al. 2014). In the 1930s, the Danish eelgrass  
531 meadows were significantly reduced by the wasting disease (Rasmussen 1977). These regime  
532 shifts in Denmark, have resulted in a 80-90 % decline corresponding to 6726 km<sup>2</sup> in the  
533 beginning of 1900's to 673-1345 km<sup>2</sup> in 2005, using the minimum and maximum estimates for  
534 the current coverage area, respectively (Boström et al. 2014). Similarly, eelgrass meadows in

Sweden have declined by some 60 % since the mid-1980s resulting in a present coverage of 68 (minimum) to 138 (maximum) km<sup>2</sup>. In Germany the eelgrass coverage area has decreased with 75 %, resulting in the present eelgrass area of 147 km<sup>2</sup> (Boström et al. 2014). In Finland there is a lack of long-term monitoring, but the meadows appear to be stable and cover at least 30 km<sup>2</sup>. It is clear, that these large-scale seagrass declines have eroded the Corg stocks in the Baltic Sea significantly (Table 2). Using the mean Corg (17.45 mg C cm<sup>-3</sup>) measured at the Danish sites, the lost Corg stock is estimated to 0.4-0.9, 23-27 and 1.9 Mt Corg in Sweden, Denmark and Germany, respectively.

For the Swedish west coast, Moksnes and Cole (2015) estimated an annual economic loss due to the lost seagrass carbon fixation capacity to be 248 € ha<sup>-1</sup>y<sup>-1</sup> (carbon price 117 € t). If also the carbon stored in the top 25 cm of sediment, as well as the loss of seagrass carbon sequestration capacity over 50 year period were taken into account, the value of the lost carbon storage and sequestration capacity was approximately 5321 € ha<sup>-1</sup>. This value is higher than our estimates for the monetary value of the present carbon storage and sequestration capacity eelgrass meadows in Finland and Denmark (281 and 1809 € ha<sup>-1</sup>). This difference is mainly due to the lower (40.3€) monetary value of carbon used in our calculations. Pendleton et al. (2014), calculated a global estimated economic cost of lost seagrass meadows (CO<sub>2</sub> price 41 \$ t) to be 1.9-13.7 billion USD. This value was derived from the cost of lost carbon sink capacity, ignoring other lost ecosystem services including e.g. coastal protection, water quality management, food provision and the role of seagrasses as fisheries and key habitats for marine species (Barbier et al. 2011, Atwood et al. 2015). Thus, we estimate the present economic value of carbon storage and sequestration capacity of Baltic Sea and Norwegian eelgrass meadows to be between 1.7 and 12 % of the global seagrass blue carbon value.

While useful, our and previous work still remain snap shots of complex processes causing local and regional variability in estimates of seagrass Blue Carbon stocks and accumulation. Clearly, in

order to produce more reliable estimates of global seagrass carbon sequestration rates and stocks, there is a need for more studies integrating and modeling the individual and joint role of e.g. sediment biogeochemistry, seascape structure, plant species architecture and hydrodynamic regime. Since seagrasses are lost at accelerating rates (Waycott et al. 2009), there is also an urgent need for a better understanding of the fate of lost seagrass carbon (Macreadie et al. 2014) and the development of the carbon sink capacity in restored seagrass ecosystems (Nellemann et al. 2009, Greiner et al. 2013, Marba et al. 2015). Nellemann et al. (2009) proposed the use of carbon trading programs using financial incentives for forest conservation, such as REDD+ (Reduced Emissions from Deforestation and Degradation) and NAMAs (Nationally Appropriate Mitigation Actions), to include the blue carbon ecosystems as part of their environmental protection protocol. Both of these carbon mitigation programs require ongoing monitoring of organic carbon storage and emission in the different Blue Carbon ecosystems. In order to manage seagrass meadows, mitigate climate change and produce information acquired for the carbon trading programs, it is fundamental to understand factors influencing the capacity of seagrass meadows to capture and store carbon. By solving these uncertainties, the conservation and restoration of seagrass meadows can be implemented in the most beneficial manner by e.g. giving priority to protection of the seagrass meadows and species with the highest carbon sink capacity and foundation of restoration projects in areas most suitable for seagrass growth (Duarte et al. 2013a).

Copyright statement

The article is distributed under the [Creative Commons Attribution 3.0](#) License. Unless otherwise stated, associated published material is distributed under the same licence. Authors grant Copernicus Publications a license to publish the article and identify itself as the original publisher. Authors grant Copernicus Publications commercial rights to produce hardcopy

Field Code Changed

588 volumes of the journal for purchase by libraries and individuals. Authors grant any third party  
589 the right to use the article freely under the stipulation that the original authors are given credit  
590 and the appropriate citation details are mentioned.

591

## 592 Acknowledgements

593

594 This work is part of a double degree program between Åbo Akademi University (ÅAU) and  
595 University of Southern Denmark (SDU). The study was funded by The Maj and Tor Nesslings  
596 Foundation and University of Southern Denmark. We are grateful for Archipelago Centre  
597 Korpoström and University of Southern Denmark for excellent working facilities. Tiina Salo and  
598 Karine Gagnon are acknowledged for field assistance and Katrine Kierkegaard and Birthe  
599 Christensen for their assistance in the laboratory work.

600

601

602

603

604

605

606

607

608

609

610

611

612

613

Alongi, D. M.: Carbon Cycling and Storage in Mangrove Forests. *Ann. Rev. Mar. Sci.* 6:195–219, 2014.

Anderson, M.J., Gorley, R.N. and Clarke, K.R.: PERMANOVA for PRIMER: guide to software and statistical methods. Plymouth, United Kingdom: PRIMER-E Ltd., 2008.

Atwood, T.B., Connolly, R.M., Euan, G.R., Lovelock, C.E., Heithaus, M.R. and Hays, G.C. Predators help protect carbon stocks in blue carbon ecosystem. *Nat. Clim. Change* 2015.

Barbier, E.B., Hacker, S.D., Kennedy, C., Koch, E.W., Stier, A.C. and Silliman, B.R.: The value of estuarine and coastal ecosystem services. *Ecol. Monogr.* 81(2):169-193, 2011.

Boström C., Baden S., Bockelmann A., Dromph K., Fredriksen S. and Gustafsson C.: Distribution, structure and function of Nordic eelgrass (*Zostera marina*) ecosystems: implications for coastal management and conservation. *Aq. Cons. Mar. Freshwater Ecosyst.* 24(3):410-434, 2014

Boström, C., Törnroos, A. and Bonsdorff, E.: Invertebrate dispersal and habitat heterogeneity: Expression of biological traits in a seagrass landscape. *J. Exp. Mar. Biol. Ecol.* 390(2):106-117, 2010.

Boström, C., Bonsdorff, E., Kangas, P. and Norkko, A.: Long-term changes of a brackish-water eelgrass (*Zostera marina* L.) community indicate effects of coastal eutrophication. *Estuar. Coast. and Shelf Sci.* 55(5):795-804, 2002.

Boström, C., O'Brien, K., Roos, C. and Ekebom, J.: Environmental variables explaining structural and functional diversity of seagrass macrofauna in an archipelago landscape. *J. Exp. Mar. Biol. Ecol.* 335(1):52-73, 2006

Bouillon S. and Boschker H.T.S.: Bacterial carbon sources in coastal sediments: a cross-system analysis based on stable isotope data of biomarkers. *Biogeosciences*, 3(2):175-185, 2006.

Bouillon, S., Dahdouh-Guebas, F., Rao, A.V.V.S., Koedam, N. and Dehairs, F.: Sources of organic carbon in mangrove sediments: variability and possible ecological implications. *Hydrobiologia*, 495(1-3):33-39, 2003.

Bouillon, S., Dehairs, F., Velimirov, B., Abril, G. and Borges, A.V.: Dynamics of organic and inorganic carbon across contiguous mangrove and seagrass systems (Gazi Bay, Kenya). *J. Geophys. Research-Biogeosciences* 112(G2):G02018, 2007.

Burnham, K.P. and Anderson, D.R.: Model Selection and Multi-Model Inference: A Practical Information-Theoretic Approach (2nd Edition). Secaucus, NJ, USA: Springer, 2002.

Conley, D.J., Björck, S., Carstensen, J., Bonsdorff, E., Destouni, G. and Gustafsson, B.G.: Hypoxia- related processes in the Baltic Sea. *Env. Sci. Tech.*, 2009.

DMU-report, Ærtebjerg, G., Andersen, J.H. and Hansen, O.S.(Eds.): Nutrients and Eutrophication in Danish Marine Waters . A Challenge for Science and Management, National Environmental Research

Institute, Denmark, 2003.

Downie, A., von Numers, M. and Boström, C.: Influence of model selection on the predicted distribution of the seagrass *Zostera marina*. *Estuar. Coast. and Shelf S.*, 121:8-19, 2013.

Duarte, C.M. and Cebrian, J.: The fate of marine autotrophic production. *Limnol. Oceanogr.*, 41(8):1758-1766, 1996.

Duarte, C.M., Middelburg, J.J. and Caraco, N.: Major role of marine vegetation on the oceanic carbon cycle. *Biogeosciences*, 2(1):1-8, 2005.

Duarte, C.M., Kennedy, H., Marba, N. and Hendriks, I.: Assessing the capacity of seagrass meadows for carbon burial: Current limitations and future strategies. *Ocean Coast Man.*, 83:32-38 2013.

Duarte, C.M., Losada, I.J., Hendriks, I.E., Mazarrasa, I. and Marba, N.: The role of coastal plant communities for climate change mitigation and adaptation. *Nature Clim. Change*, 3 (11):961-968, 2013.

Folk, R.L. and Ward, W.C.: Brazos river bar: a study of significance of grain size parameters. *J. Sediment Petrol* 1957;27:3, 1957

Fonseca and Fisher, J.S.: A comparison of canopy friction and sediment movement between four species of seagrass with reference to their ecology and restoration. *Marine ecology progress series*. Oldendorf, 29(1):15-22, 1986

Fonseca, M.S. and Cahalan, J.A.: A preliminary evaluation of wave attenuation by four species of seagrass. *Estuar. Coast. Shelf Sci.* 1992 12; 35(6):565-576, 1992.

Fourqurean, J.W. and Schlau, J.E. Changes in nutrient content and stable isotope ratios of C and N during decomposition of seagrasses and mangrove leaves along a nutrient availability gradient in Florida Bay, USA. *Chem. Ecol.* 19:373-390, 2003.

Fourqurean, J.W., Duarte, C.M., Kennedy, H., Marba, N., Holmer, M. and Mateo, A.M.: Seagrass ecosystems as a globally significant carbon stock. *Nature Geoscience*, 5(7):505-509, 2012.

Fry B. and Sherr E.B.  $\delta^{13}\text{C}$  measurements as indicators of carbon flow in marine and freshwater ecosystems. *Contrib. Mar. Sci.*, 27:13, 1984.

Fry, B., Scalan, R.S., Parker, P.L.: Stable Carbon Isotope Evidence for 2 Sources of Organic-Matter in Coastal Sediments - Seagrasses and Plankton. *Geochim. Cosmochim. Acta* 41(12):1875-1877, 1977.

Gacia, E., Granata, T.C. and Duarte, C.M.: An approach to measurement of particle flux and sediment retention within seagrass (*Posidonia oceanica*) meadows. *Aquat. Bot.*, 65(1-4):255-268, 1999.

Gacia, E. and Duarte, C.M. and Middelburg, J.J.: Carbon and nutrient deposition in a Mediterranean seagrass (*Posidonia oceanica*) meadow. *Limnol. Oceanogr.* 47(1):23-32, 2002.

Gattuso, J.P., Frankignoulle, M. and Wollast R. Carbon and carbonate metabolism in coastal aquatic ecosystems. *Ann. Rev. Ecol. Syst.*, 29:405-434, 1998.

Greiner, J.T., McGlathery, K.J., Gunnell, J. and McKee, B.A. Seagrass Restoration Enhances "Blue Carbon" Sequestration in Coastal Waters. *Plos One*, 8(8):e72469, 2013.

- Gustafsson, C. and Boström, C.: Algal mats reduce eelgrass (*Zostera marina* L.) growth in mixed and monospecific meadows. *Journal of Experimental Marine Biology and Ecology*. 461:85-92, 2014.
- Hendriks, I.E., Sintes, T., Bouma, T.J. and Duarte, C.M.: Experimental assessment and modeling evaluation of the effects of the seagrass *Posidonia oceanica* on flow and particle trapping. *Mar. Ecol. Prog. Ser.* 356:163-173, 2008.
- Herr, D., Pidgeon, E., Laffoley, D. (Eds.): Blue Carbon. Policy Framework: Based on the Discussion of the International Blue Carbon Policy Working Group, IUCN and Arlington, Gland, Switzerland, USA: CI. vi+39pp, 2012.
- Holmer, M., Duarte, C.M., Boschker, H.T.S. and Barron, C.: Carbon cycling and bacterial carbon sources in pristine and impacted Mediterranean seagrass sediments. *Aquat. Microb. Ecol.*, 36(3):227-237, 2004.
- Holmer, M., Baden, S., Bostrom C and Moksnes P.: Regional variation in eelgrass (*Zostera marina*) morphology, production and stable sulfur isotopic composition along the Baltic Sea and Skagerrak coasts. *Aquat. Bot.*, 91(4):303-310, 2009.
- Holmer, M. 2009. Productivity and biogeochemical cycling in seagrass ecosystems. In *Coastal Wetlands: An Integrated Ecosystem Approach*, ed. G.M.E. Perillo, E. Wolanski, D.R. Cahoon and M.M. Brinson, 377-401. Amsterdam, The Netherlands.
- Holmer, M., Wirachwong, P. and Thomsen, M.S.: Negative effects of stress-resistant drift algae and high temperature on a small ephemeral seagrass species. *Mar. Biol.*, 158(2):297-309, 2011.
- Kennedy, H., Gacia, E., Kennedy, D.P., Papadimitriou, S. and Duarte, C.M.: Organic carbon sources to SE Asian coastal sediments. *Estuar. Coast. and Shelf S.*, 60(1):59-68, 2004.
- Kennedy, H. and Björk, M.: Seagrasses, in *The Management of Natural Coastal Carbon Sinks in Coastal Ecosystems: Investigating and Realising the Potential*. 2009.
- Kennedy, H., Beggins, J., Duarte, C.M., Fourqurean, J.W., Holmer, M. and Marba, N.: Seagrass sediments as a global carbon sink: Isotopic constraints. *Glob. Biogeochem. Cycles*, 24:GB4026, 2010.
- Kristensen, E. and Andersen, F.Ø.: Determination of organic carbon in marine sediments: a comparison of two CHN-analyzer methods. *J. Exp. Mar. Biol. Ecol.* 109:15-23, 1987.
- Kristensen, E. and Holmer, M.: Decomposition of plant materials in marine sediment exposed to different electron acceptors (O<sub>2</sub>, NO<sub>3</sub><sup>-</sup>, and SO<sub>4</sub><sup>2-</sup>), with emphasis on substrate origin, degradation kinetics, and the role of bioturbation. *Geochim. Cosmochim. Acta*, 65(3):419-433, 2001.
- Lavery, P.S., Mateo, M., Serrano, O. and Rozaimi, M.: Variability in the Carbon Storage of Seagrass Habitats and Its Implications for Global Estimates of Blue Carbon Ecosystem Service. *Plos One*, 8(9):e73748, 2013.
- Legendre, P. and Anderson, M.J.: Distance-based redundancy analysis: Testing multispecies responses in multifactorial ecological experiments (vol 69, pg 1). *Ecol. Monogr.*, 69(4):512-512, 1999.
- Macreadie, P.I., Baird, M.E., Trevathan-Tackett, S.M., Larkum, A.W.D. and Ralph, P.J.: Quantifying and modelling the carbon sequestration capacity of seagrass meadows - A critical assessment. *Mar. Pollut.*

Bull., 83(2):430-439, 2014.

Marba, N., Arias-Ortiz, A., Masque, P., Kendrick, G. A., Mazarrasa, I., Bastyan, G. R., Garcia-Orellana, J. and Duarte, C. M.: Impact of seagrass loss and subsequent revegetation on carbon sequestration and stocks. *J. of Ecology* 103:296-302.

Mcleod, E., Chmura, G.L., Bouillon, S., Salm, R., Bjork, M. and Duarte, C.M.: A blueprint for blue carbon: toward an improved understanding of the role of vegetated coastal habitats in sequestering CO<sub>2</sub>. *Front. Ecol. Env.*, 9(10):552-560, 2011.

Miyajima, T., Hori, M., Hamaguchi, M., Shimabukuro, H., Adachi, H. and Yamano, H.: Geographic variability in organic carbon stock and accumulation rate in sediments of East and Southeast Asian seagrass meadows. *Glob. Biogeochem. Cycles*, 29(4):397-415, 2015.

Moksnes, P.-E. and Cole, S. G.: Valuing multiple eelgrass ecosystem services in Sweden: Fish production and uptake of carbon and nitrogen. *Front. Mar. Sci.* 2(121):1-18, 2015.

Moncreiff, C.A. and Sullivan M.J.: Trophic importance of epiphytic algae in subtropical seagrass beds: evidence from multiple stable isotope analyses. *Mar. Ecol. Prog. Ser.*, 215:93-106, 2001.

Nellemann, C., Corcoran, E., Duarte, C.M., Valdés, L., De Young, C. and Fonseca, L.: Blue Carbon. A Rapid Response Assessment, 2009.

Norkko, A. and Bonsdorff, E.: Rapid zoobenthic community responses to accumulations of drifting algae. *Mar. Ecol. Prog. Ser.*, 131:143-157, 1996.

Olesen, B. and Sandjensen, K.: Patch Dynamics of Eelgrass *Zostera marina*. *Mar. Ecol. Prog. Ser.* 106(1-2):147-156, 1994.

Orth, R.J., Carruthers, T.J.B., Dennison, W.C., Duarte, C.M., Fourqurean, J.W. and Heck, K. L.Jr. : A global crisis for seagrass ecosystems. *Bioscience*, 56(12):987-996, 2006.

Pedersen, M. Ø., Serrano, O., Mateo, M.A., Holmer, M.: Temperature effects on decomposition of a *Posidonia oceanica* mat. *Aquat. Microb. Ecol.* 65: 169-182, 2011.

Pendleton, L., Donato, D.C., Murray, B.C., Crooks, S., Jenkins, W.A. and Sifleet, S: Estimating Global "Blue Carbon" Emissions from Conversion and Degradation of Vegetated Coastal Ecosystems. *Plos One*, 7(9):e43542, 2012.

Petersen, J.K., Maar, M., Ysebaert, T. and Herman, P.M.J.: Near-bed gradients in particles and nutrients above a mussel bed in the Limfjorden: influence of physical mixing and mussel filtration. *Mar. Ecol. Prog. Ser.*, 490:137-146, 2013.

Phillips, D.L. and Gregg, J.W.: Source partitioning using stable isotopes: coping with too many sources. *Oecologia*, 136(2):261-269, 2003.

Rask, N., Pedersen, S.E. and Jensen, M.H.: Response to lowered nutrient discharges in the coastal waters around the island of Funen, Denmark. *Hydrobiologia*, 393:69, 1999.

Rasmussen, E.: The wasting disease of eelgrass *Zostera marina* and its effects on environmental factors and fauna. *Seagrass ecosystems. A scientific perspective*. New York: Marcel Dekker Inc., 1977.

Rasmussen, J.R., Pedersen, M.F., Olesen, B., Nielsen, S.L. and Pedersen, T. M. : Temporal and spatial dynamics of ephemeral drift-algae in eelgrass *Zostera marina*, beds. *Estuar. Coast. and Shelf S.* 119:167-175, 2013.

Salovius, S. and Bonsdorff, E.: Effects of depth, sediment and grazers on the degradation of drifting filamentous algae (*Cladophora glomerata* and *Pilayella littoralis*). *Journal of Experimental Marine Biology and Ecology*. 298:93-109, 2004.

Schlacher, T.A. and Conolly, R.M.: Effects of acid treatment on carbon and nitrogen stable isotope ratios in ecological samples: a review and synthesis. *Methods in Ecology and Evolution* 5(6):541-550, 2014.

Serrano, O., Lavery, P.S., Rozaimi, M. and Mateo, A. M.: Influence of water depth on the carbon sequestration capacity of seagrasses. *Global Biogeochem. Cycles* 28(9):950-961, 2014.

Short, F. and Duarte, C.M.: Methods for the measurement of seagrass growth and production. In: Short and Cole, editors. *Global seagrass research methods* Amsterdam: Elsevier; p. 155-182, 2001.

Spalding, M., Taylor, M., Ravilious, C., Short, F., Green, E.: Global overview: The distribution and status of seagrasses. In: Green, E.P. and Short F.T.: editors. *World Atlas of Seagrasses: Present Status and Future Conservation*. Berkeley California: University of California Press, p. 5-26, 2003.

United States Government. Technical Support Document: Social Cost of Carbon for Regulatory Impact Analysis Under Executive Order 12866 (United States Government Interagency Working Group on Social Cost of Carbon, Washington, DC), 2010.

Waycott, M., Duarte, C.M., Carruthers, T.J.B., Orth, R.J., Dennison, W.C. and Olyarnik, S.: Accelerating loss of seagrasses across the globe threatens coastal ecosystems. *Proc. Natl. Acad. Sci. USA*, 106(30):12377-12381, 2009.

Vichkovitten, T. and Holmer, M. Contribution of plant carbohydrates to sedimentary carbon mineralization. *Org. Geochem.*, 35(9):1053-1066, 2004.

Wiles, P.J., van Duren, L.A., Hase, C., Larsen, J. and Simpson, J.H.: Stratification and mixing in the Limfjorden in relation to mussel culture. *J. Mar. Syst.*, 60(1-2):129-143, 2006.

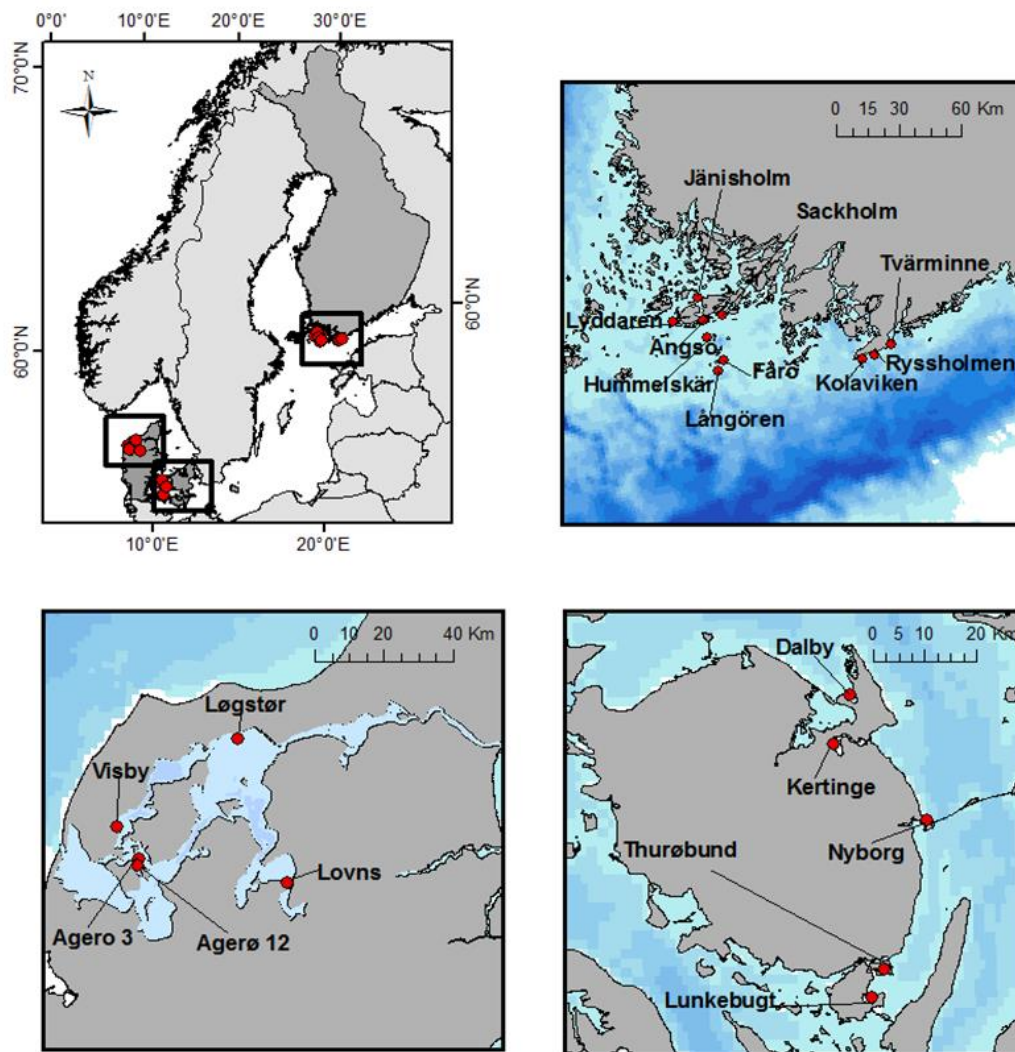

616 Fig.1. The study sites in Denmark and Finland.  
617

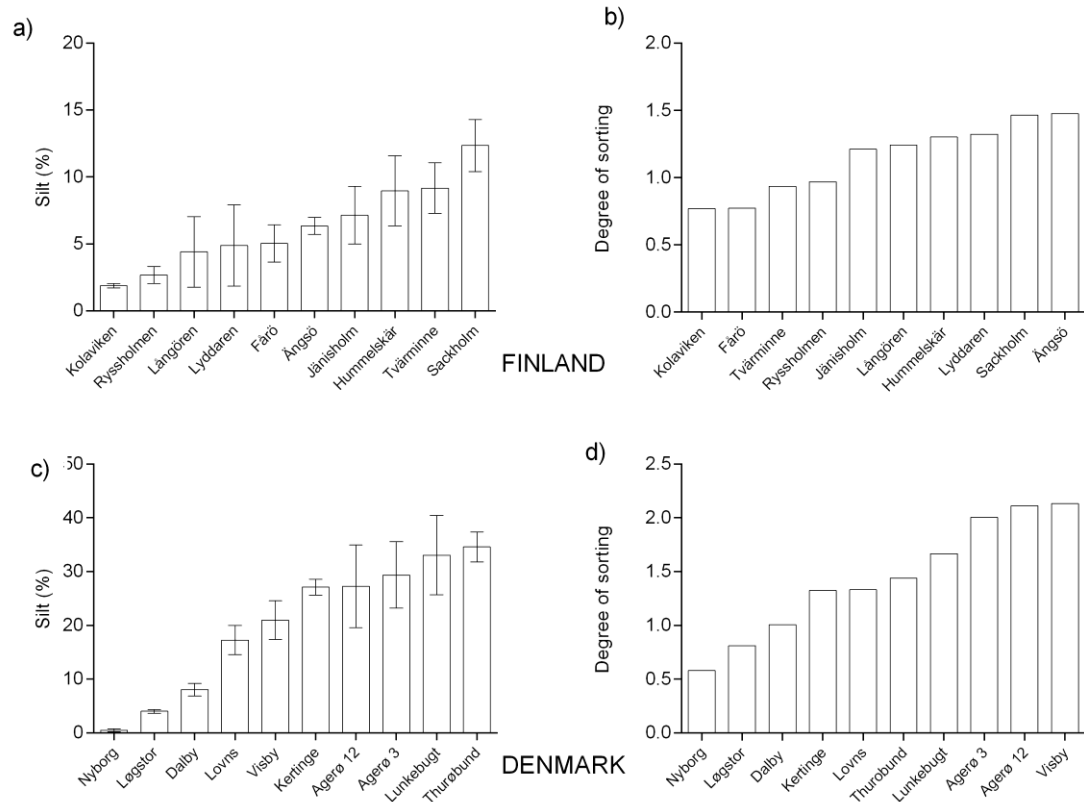

Fig. 2. A percentage silt (a, c) and degree of sediment sorting (b, d) at the study sites in Finland and Denmark, respectively. Lower values in degree of sorting indicate well-sorted sediment types.

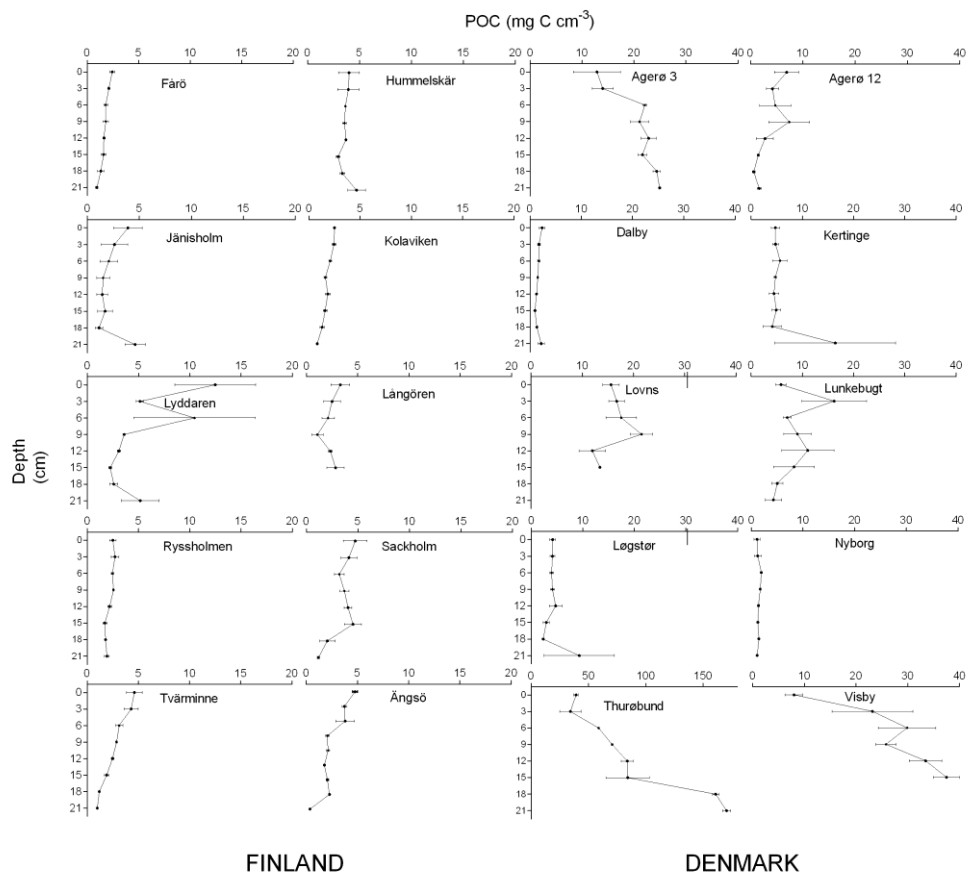

644  
645 Fig.3. Sediment profiles of particulate organic carbon (POC) content ( $\text{mg C cm}^{-3}$ ) in the top 25 cm  
646 of the Finnish and Danish eelgrass (*Zostera marina*) meadows. Note the difference in the scale of  
647 x-axis between the regions.  
648  
649  
650  
651  
652  
653  
654  
655  
656  
657  
658  
659  
660  
661  
662  
663  
664  
665  
666

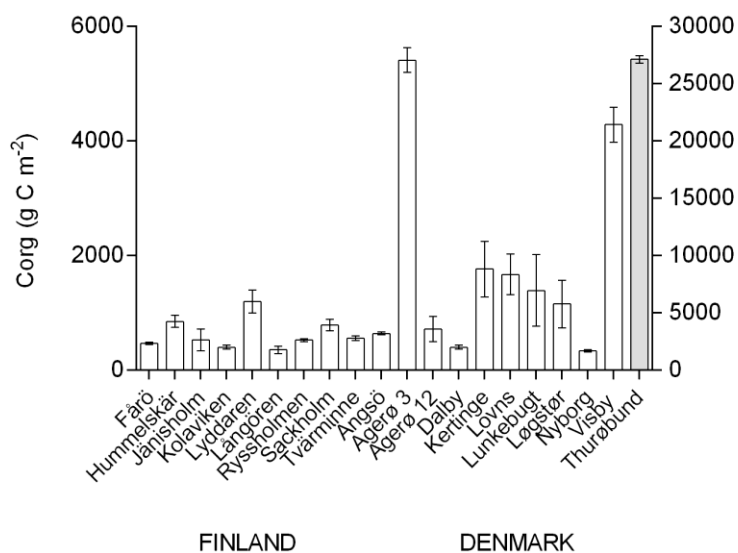

Fig.4. Organic carbon stocks (Corg, g C m<sup>-2</sup>) in the top 25 cm of sediment in Finnish and Danish eelgrass (*Zostera marina*) meadows. Note that the value of Thurøbund (grey bar) corresponds to right y- axis.

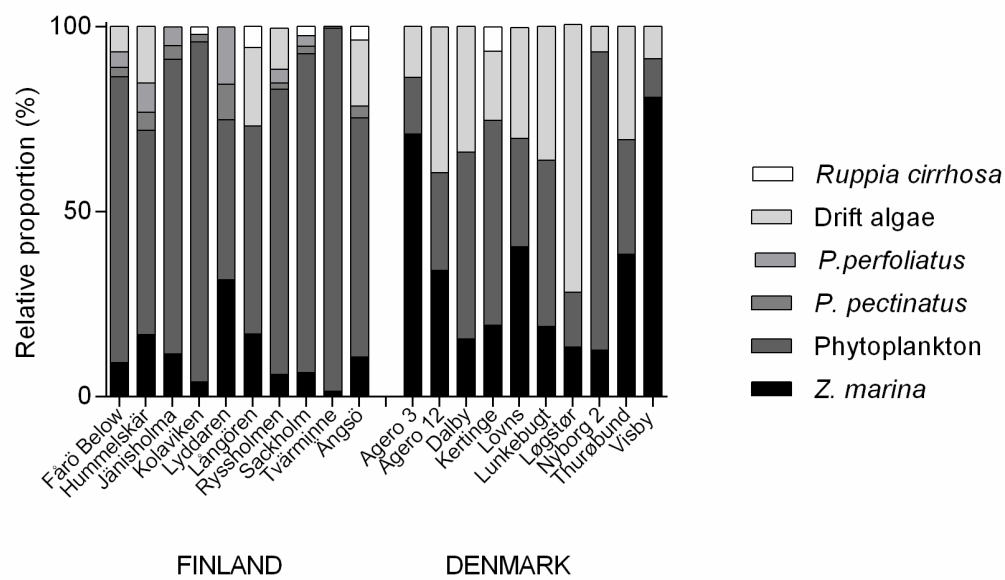

Fig.5. Relative contribution of organic matter sources (*Z. marina*, *P. perfoliatus*, *P. pectinatus*, *Ruppia cirrhosa*, phytoplankton and drift algae) to the <sup>13</sup>C signal of the sediment surface layer (0-2 cm) in Finnish and Danish eelgrass (*Z. marina*) meadows.

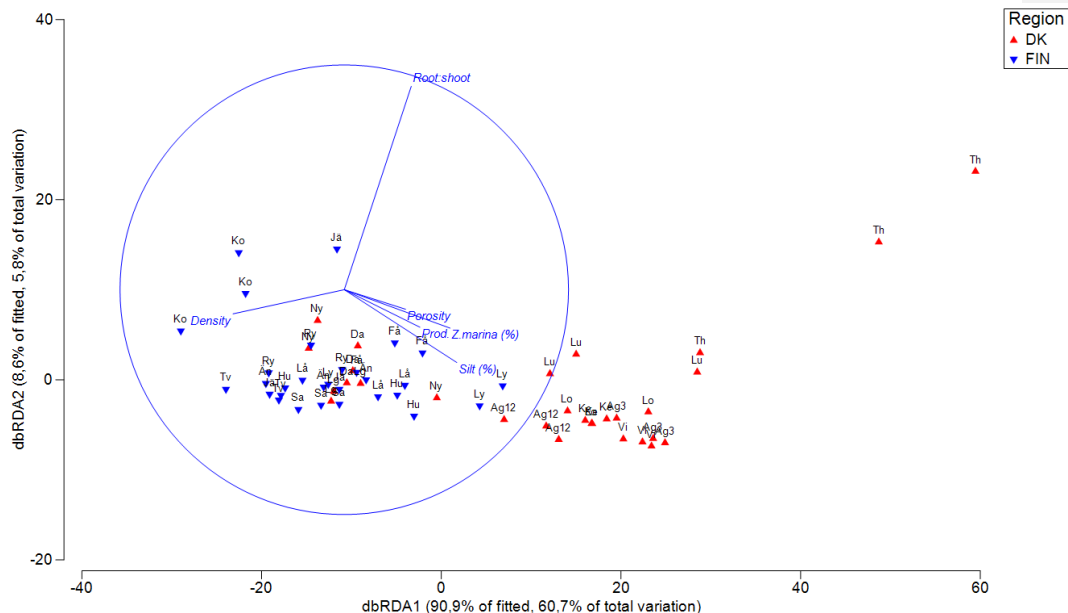

Fig.6. Distance-based redundancy analysis (DbrDA) plot showing the environmental parameters (percentage of *Z. marina* in sediment carbon pool, above: belowground- ratio, annual eelgrass production, sediment silt content, sediment dry density and sediment porosity) fitted to the variation in the Corg stock ( $\text{g C m}^{-2}$ ) at the Finnish and Danish eelgrass (*Z. marina*) sites, respectively. Vectors indicate direction of the parameters effect. Site codes: Finland; Ko=Kolaviken, Ry=Ryssholmen, Tv=Tvärminne, Få=Fårö, Ly=Lyddaren, Lå=Långören, Hu=Hummelskär, Jä=Jänisholm. Site codes: Denmark; Ag12=Agerø 12, Ag3=Agerø 3, Vi=Visby, Lg=Løgstør, Lo=Lovns, Th=Thurøbund, Lu=Lunkebugt, Da=Dalby, Ke=Kertinge, Ny=Nyborg.

730 Table 1. Location, silt content (% silt), sediment organic matter content (%DW),  $\delta^{13}\text{C}$  sediment surface,  $\Delta^{13}\text{C}$  *Z. marina* leaves ,  $\Delta^{13}\text{C}$  *Z. marina*  
731 rhizomes, seagrass shoot density (shoots  $\text{m}^{-2}$ ), seagrass above and below-ground biomass (gDW  $\text{m}^{-2}$ ), root:shoot-ratio, and above-ground production  
732 (gDW  $\text{m}^{-2}\text{y}^{-1}$ ) at the sampling sites. SE (n= 3–4) is given. Annual seagrass production is calculated from pooled values of replicates per site and  
733 therefore no SE is shown.  
734

| Location               | Silt content<br>(% silt) | Organic<br>matter<br>content (%<br>DW) | $\delta^{13}\text{C}$ sediment<br>surface | $\delta^{13}\text{C}$ <i>Z. marina</i><br>leaves | $\delta^{13}\text{C}$ <i>Z. marina</i><br>rhizomes | Shoot<br>density<br>(shoots<br>$\text{m}^{-2}$ ) | Above-<br>ground<br>biomass<br>(gDW $\text{m}^{-2}$ ) | Below-<br>ground<br>biomass<br>(gDW $\text{m}^{-2}$ ) | Root: shoot-<br>ratio | Above-<br>ground<br>production<br>(gDW $\text{m}^{-2}\text{y}^{-1}$ ) |
|------------------------|--------------------------|----------------------------------------|-------------------------------------------|--------------------------------------------------|----------------------------------------------------|--------------------------------------------------|-------------------------------------------------------|-------------------------------------------------------|-----------------------|-----------------------------------------------------------------------|
| Finland                |                          |                                        |                                           |                                                  |                                                    |                                                  |                                                       |                                                       |                       |                                                                       |
| Fårö                   | 5.0±1.4                  | 0.66±0.07                              | -20.58±0.27                               | -9.66±0.35                                       | -9,01±0.20                                         | 304±32                                           | 138±20                                                | 167±28                                                | 1.27±0.13             | 773                                                                   |
| Hummelskär             | 9.0±2.6                  | 1.06±0.20                              | -19.36±1.22                               | -9.31±0.28                                       | -9,83±0.25                                         | 364±31                                           | 70±11                                                 | 28±2                                                  | 0.45±0.06             | 446                                                                   |
| Jänisholm              | 7.1±2.1                  | 0.93±0.20                              | -22.05±0.37                               | -10.84±0.39                                      | -11,01±0.28                                        | 128±17                                           | 65±16                                                 | 46±2                                                  | 1.44±0.53             | 270                                                                   |
| Kolaviken              | 1.9±0.2                  | 0.75±0.02                              | -19.48±0.23                               | -10.32±0.28                                      | -11,36±0.34                                        | 476±96                                           | 74±6                                                  | 149±16                                                | 2.07±0.27             | 324                                                                   |
| Lyddaren               | 4.9±2.5                  | 1.75±0.70                              | -13.53±3.52                               | -8.75±0.35                                       | -9,58±0.29                                         | 228±42                                           | 86±7                                                  | 57±12                                                 | 0.64±0.09             | 505                                                                   |
| Långören               | 4.4±2.1                  | 2.70±2.10                              | -18.88±0.35                               | -8.51±0.14                                       | -8,87±0.15                                         | 436±53                                           | 121±46                                                | 68±25                                                 | 0.58±0.06             | 788                                                                   |
| Ryssholmen             | 2.7±0.6                  | 0.89±0.20                              | -20.70±0.34                               | -11.45±0.13                                      | -11,49±0.29                                        | 756±57                                           | 160±3                                                 | 136±16                                                | 0.86±0.11             | 803                                                                   |
| Sackholm               | 12.4±1.9                 | 0.95±0.20                              | -21.07±0.78                               | -10.34±0.68                                      | -9,90±0.34                                         | 774±234                                          | 110±18                                                | 37±9                                                  | 0.31±0.04             | 377                                                                   |
| Tvärminne              | 9.2±1.9                  | 0.88±0.20                              | -22.73±0.59                               | -11.61±0.09                                      | -11,50±0.25                                        | 112±11                                           | 99±16                                                 | 38±7                                                  | 0.37±0.01             | 436                                                                   |
| Ängsö                  | 6.3±0.5                  | 0.84±0.02                              | -20.05±0.28                               | -10.28±0.08                                      | -10,27±0.28                                        | 604±98                                           | 91±6                                                  | 63±9                                                  | 0.67±0.05             | 521                                                                   |
| <b>Finland average</b> | <b>6.3±1</b>             | <b>1.4±0.3</b>                         | <b>-19.85±0.32</b>                        | <b>-10,11±0.33</b>                               | <b>10,28±0.32</b>                                  | <b>417±75</b>                                    | <b>101±3</b>                                          | <b>79±5</b>                                           | <b>0.87±0.06</b>      | <b>524</b>                                                            |

|                        |                 |                |                    |                   |                    |               |              |               |                  |            |
|------------------------|-----------------|----------------|--------------------|-------------------|--------------------|---------------|--------------|---------------|------------------|------------|
|                        |                 |                |                    |                   |                    |               |              |               |                  |            |
| Denmark                |                 |                |                    |                   |                    |               |              |               |                  |            |
| Agero 3                | 29.4±6.2        | 1.94±0.60      | -12.95±1.67        | -9,24±0.47        | -11,14±0.22        | 448±89        | 181±33       | 84±8          | 0.52±0.07        | 1075       |
| Agero 12               | 27.3±7.7        | 1.65±0.80      | -17.35±0.84        | -10,68±0.25       | -11,94±0.21        | 404±90        | 110±2        | 46±9          | 0.40±0.08        | 576        |
| Dalby                  | 8.1±1.2         | 0.67±0.03      | -17.29±0.69        | -9,68±0.27        | -10,50±0.56        | 400±48        | 76±7         | 83±10         | 1.09±0.11        | 470        |
| Kertinge               | 27.1±1.5        | 12.59±1.60     | -16.64±0.20        | -9,18±0.10        | -9,75±0.08         | 328±64        | 90±17        | 64±14         | 0.68±0.02        | 527        |
| Lovns                  | 17.3±2.7        | 2.90±0.50      | -16.25±2.44        | -11,51±0.35       | -12,16±0.37        | 360±27        | 141±4        | 100±11        | 0.70±0.06        | 848        |
| Lunkebugt              | 33.0±7.4        | 4.72±2.40      | -16.93±0.25        | -8,86±0.87        | -10,60±0.38        | 347±81        | 210±10       | 382±24        | 1.82±0.08        | 1056       |
| Løgstør                | 4.0±0.4         | 0.75±0.03      | -17.68±0.35        | -9,67±0.40        | -10,39±0.51        | 300±14        | 149±11       | 63±13         | 0.42±0.07        | 755        |
| Nyborg                 | 0.5±0.3         | 0.42±0.02      | -17.57±1.09        | -9,33±0.17        | -10,62±0.34        | 652±30        | 203±24       | 214±50        | 1.00±0.14        | 1179       |
| Thurøbund              | 34.6±2.8        | 14.48±0.80     | -15.54±0.42        | -8,17±0.14        | -9,03±0.22         | 420±98        | 101±16       | 398±15        | 4.54±0.70        | 619        |
| Visby                  | 21.0±3.6        | 1.17±0.06      | -13.79±1.17        | -11,97±0.56       | -12,41±0.70        | 520±21        | 193±13       | 49±4          | 0.25±0.01        | 2172       |
| <b>Denmark average</b> | <b>20.2±3.9</b> | <b>3.9±1.5</b> | <b>-16.20±0.22</b> | <b>-9.82±0.37</b> | <b>-10.85±0.33</b> | <b>418±32</b> | <b>145±5</b> | <b>148±14</b> | <b>1.14±0.13</b> | <b>928</b> |

Table 2. Estimated average carbon stocks (g C m<sup>-2</sup> and Mt), annual areal carbon accumulation (Corg seq t C ha<sup>-1</sup>y<sup>-1</sup>) and annual carbon accumulation (Annual Corg (Mt y<sup>-1</sup>) in Finnish and Danish eelgrass (*Z. marina*) meadows. Denmark<sub>lost</sub> = eelgrass area of the region lost since the beginning 1900's. Limfjorden<sub>lost</sub>= eelgrass area of the region lost since the 1900's. See text for calculations. \*) mean Corg (mg C cm<sup>-3</sup>) calculated for Denmark is used. n.d= no data. For calculations of annual carbon accumulation three different sediment accumulation rates were applied (0.32 mm y<sup>-1</sup>; Miyayima et al. 2015, 2.02 mm y<sup>-1</sup>; Duarte et al. 2013b and 4.2 mm y<sup>-1</sup>; Serrano et al. 2014), for Corg seq the sediment accumulation rate of 2.02 mm y<sup>-1</sup> was used.

| Region                  | Seagrass area (km <sup>2</sup> ) | Corg stock (mg C cm <sup>-3</sup> ) | Corg stock (g C m <sup>-2</sup> ) | Corg stock (Mt) | Corg seq. (t C ha <sup>-1</sup> y <sup>-1</sup> ) | Annual Corg accumulation (Mt y <sup>-1</sup> ) |                         |                         |
|-------------------------|----------------------------------|-------------------------------------|-----------------------------------|-----------------|---------------------------------------------------|------------------------------------------------|-------------------------|-------------------------|
|                         |                                  |                                     |                                   |                 |                                                   | 0.32 mm y <sup>-1</sup>                        | 2.02 mm y <sup>-1</sup> | 4.20 mm y <sup>-1</sup> |
| land                    | 30                               | 2.60±0.09                           | 627±25                            | 0.019±< 0.001   | 0.052                                             | 0.002                                          | 0.016                   | 0.0328                  |
| Limfjorden              | 18                               | 10.57±1.66                          | 2644±207                          | 0.047± 0.007    | 0.213                                             | 0.006                                          | 0.038                   | 0.079                   |
| Finland                 | 179                              | 24.32±9.15                          | 6005±1127                         | 1.090±0.410     | 0.491                                             | 0.139                                          | 0.881                   | 1.832                   |
| Denmark <sub>min</sub>  | 673                              | 17.45±9.42*                         | 4324±1188*                        | 2.164±0.005     | 0.352                                             | 0.376                                          | 2.373                   | 3.636                   |
| Denmark <sub>max</sub>  | 1345                             | 17.45±9.42*                         | 4324±1188*                        | 5.868±0.014     | 0.352                                             | 0.75                                           | 4.741                   | 9.859                   |
| Denmark <sub>lost</sub> | 5381-6230                        | 17.45±9.42*                         | 17.45±9.42*                       | 23.478-27.183   | n.d                                               | n.d                                            | n.d                     | n.d                     |

758 Table 3. Table from DistLm analysis showing variables in the marginal tests and the results for  
759 statistical analysis.  
760

| MARGINAL TESTS                 |                   |          |         |            |
|--------------------------------|-------------------|----------|---------|------------|
| Variable                       | Sum of<br>Squares | Pseudo-F | P-value | Proportion |
| 1. Root: shoot- ratio          | 5309              | 10.64    | 0.002   | 0.155      |
| 2. Sediment dry density        | 10704             | 26.37    | 0.001   | 0.313      |
| 3. Annual eelgrass production  | 4959              | 9.82     | 0.002   | 0.145      |
| 4. Shoot density               | 48                | 0.08     | 0.911   | 0.001      |
| 5. Porosity                    | 3507              | 6.61     | 0.01    | 0.102      |
| 6. % silt                      | 12653             | 33.99    | 0.001   | 0.369      |
| 7. C:N-ratio of plant material | 464               | 0.79     | 0.397   | 0.014      |
| 8. <i>Z. marina</i> %          | 12179             | 32.02    | 0.001   | 0.356      |
| 9. Degree of sorting           | 9725              | 23.01    | 0.001   | 0.284      |

761  
762  
763  
764  
765  
766  
767  
768  
769  
770  
771  
772  
773  
774  
775  
776  
777  
778  
779

780 Table 4. Table from DistLm analysis showing results from the sequential tests and solution given  
781 by the analysis.

782

| Variable              | AICc  | Sum of squares | Pseudo-F | P- value  | Proportion | Cumulative proportion | Degrees of freedom |
|-----------------------|-------|----------------|----------|-----------|------------|-----------------------|--------------------|
| 6. % silt             | 357.4 | 12653          | 33.9     | 0.001     | 0.369      | 0.369                 | 58                 |
| 1. Root :shoot-ratio  | 346.0 | 4375           | 14.5     | 0.001     | 0.127      | 0.497                 | 57                 |
| 8. <i>Z. marina</i> % | 333.6 | 3745           | 15.6     | 0.001     | 0.109      | 0.606                 | 56                 |
| 3. Production         | 332.2 | 805            | 3.5      | 0.037     | 0.023      | 0.630                 | 55                 |
| 2. Density            | 331.3 | 700            | 3.2      | 0.049     | 0.020      | 0.650                 | 54                 |
| 5. Porosity           | 330.8 | 602            | 2.8      | 0.056     | 0.017      | 0.668                 | 53                 |
| BEST SOLUTION         | AICc  | R^2            | RSS      | Variables | Selections |                       |                    |
|                       | 330.8 | 0.668          | 11363    | 6         | 1-3;5;6;8  |                       |                    |

783

784

785

786

787

788

789

790

791

792

793

794
